# Supplementary material for: Functional Analysis of the PCCA and PCCB Gene Variants Predicted to Affect Splicing
Source: MDPI journal article supplement (doi:10.3390/ijms22084154), 2021-04-16
Supplement: s1 [file s1]

**Table S1.** Analysis of the variants for alteration of splicing regulatory motifs. Negative ESRseq and Hexplorer scores indicates the decrease of exonic splicing enhancers` (ESE) or increase of exonic splicing silencers` (ESS) motifs. The higher EX-SKIP value is, the more ESS prevail over ESE in mutated sequence. ESE motifs favor exon recognition, while ESS motifs inhibit it.

| Variant<br>(PCCA)             | HExoSplice (ESRseq<br>score variant vs wild-<br>type) | EX-SKIP (ESS/ESE of<br>mutated sequence to<br>ESS/ESE of WT sequence) | Hexplorer Score<br>delta (mt-wt) |
|-------------------------------|-------------------------------------------------------|-----------------------------------------------------------------------|----------------------------------|
| c.431G>T (p.Gly144Val)        | -2.5128                                               | 1,57                                                                  | -95.62                           |
| c.611_613del<br>(p.Glu230del) | N/A                                                   | 1,43                                                                  | -105.6                           |
| c.742G>A (p.Glu248Lys)        | -3.7007                                               | 1,24                                                                  | -97.31                           |
| c.893A>G (p.Lys298Arg)        | -1.4216                                               | 1,21                                                                  | -124                             |
| c.1103A>G<br>(p.Asp368Gly)    | -1.9296                                               | 1,28                                                                  | -110                             |
| c.1292T>G<br>(p.Val431Gly)    | -1.3075                                               | 1,26                                                                  | -80.58                           |
| c.2056G>T (p.Glu686*)         | -3.8884                                               | 1,32                                                                  | -134                             |
| c.1367G>T<br>(p.Gly456Val)    | +0.3858                                               | 1,65                                                                  | -46.07                           |
